# Supplementary material for: Clinical pattern of checkpoint inhibitor-induced liver injury in a multicentre cohort
Source: PubMed Central journal article supplement (PMC10149360; doi:10.1016/j.jhepr.2023.100719), 2023-03-07
Supplement: mmc1.pdf [file mmc1.pdf]

## Supplemental information

### Clinical pattern of checkpoint inhibitor-induced liver injury in a multi-centre cohort

Lina Hountondji, Christophe Ferreira De Matos, Fanny Lebossé, Xavier Quantin, Candice Lesage, Pascale Palassin, Valérian Rivet, Stéphanie Faure, Georges-Philippe Pageaux, Éric Assenat, Laurent Alric, Amel Zahaf, Dominique Larrey, Philine Witkowski Durand Viel, Benjamin Riviere, Selves Janick, Stéphane Dalle, Alexandre Thibault Jacques Maria, Thibaut Comont, and Lucy Meunier

# **Clinical pattern of checkpoint inhibitor-induced liver injury in a multicenter cohort**

Lina Hountondji, Christophe Ferreira De Matos, Fanny Lebossé, Xavier Quantin, Candice Lesage, Pascale Palassin, Valérian Rivet, Stéphanie Faure, Georges-Philippe Pageaux, Éric Assenat, Laurent Alric, Amel Zahaf, Dominique Larrey, Philine Witkowski Durand Viel, Benjamin Riviere, Selves Janick, Stéphane Dalle, Alexandre Thibault Jacques Maria, Thibaut Comont<sup>#</sup>, Lucy Meunier<sup>#</sup>

## **Table of contents:**

Table S1: Clinico-biological comparison between cholestatic and hepatocellular patterns

Table S2: Clinico-biological features between immune-related sclerosing cholangitis and CHILI without macroscopic bile duct injury

Table S3: Comparison between treated and non-treated CHILI

Table S4: Comparison between steroids including treatment and other conditions

Table S5: Comparison between biopsied and non-biopsied patients

Table S6: Comparison between patients with and without rechallenge

Table S1: Clinico-biological comparison between cholestatic and hepatocellular patterns

|                                                    | Cholestatic hepatitis<br>n= 43 (36.8 %) | Hepatocellular hepatitis<br>n= 45 (38.5 %) | <i>p</i> value    |
|----------------------------------------------------|-----------------------------------------|--------------------------------------------|-------------------|
| <b>Age (years), mean (SD)</b>                      | 68                                      | 60                                         | <b>0.004</b>      |
| <b>Sex, n (%)</b>                                  |                                         |                                            | 0.133             |
| Female                                             | 17 (19.3)                               | 25 (28.4)                                  |                   |
| Male                                               | 26 (29.5)                               | 20 (22.7)                                  |                   |
| <b>Cancer, n (%)</b>                               |                                         |                                            | 0.091             |
| Lung                                               | 15 (17)                                 | 10 (11.4)                                  |                   |
| Melanoma                                           | 14 (15.9)                               | 23 (26.1)                                  |                   |
| Renal and urothelial                               | 7 (8)                                   | 10 (11.4)                                  |                   |
| Other cancer                                       | 7 (8)                                   | 2 (2.3)                                    |                   |
| <b>Checkpoint inhibitor, n (%)</b>                 |                                         |                                            | <b>&lt; 0.001</b> |
| Anti-PD1/PDL1                                      | 35 (39.8)                               | 16 (18.2)                                  |                   |
| Anti-CTLA4/Anti-LAG3                               | 1 (1.1)                                 | 2 (2.3)                                    |                   |
| Combotherapy with anti-CTLA4                       | 7 (8)                                   | 27 (30.7)                                  |                   |
| <b>Cycles of ICI infusion, mean (SD)</b>           | 4.9 (4.4)                               | 3.5 (2.4)                                  | 0.64              |
| <b>Time until onset (days), mean (SD)</b>          | 182.4 (262.5)                           | 191.6 (372.1)                              | 0.894             |
| <b>RUCAM</b>                                       |                                         |                                            | 0.111             |
| Possible (3-5)                                     | 0                                       | 4 (4.5)                                    |                   |
| Probable (6-8)                                     | 28 (31.8)                               | 24 (27.3)                                  |                   |
| Highly probable (≥ 9)                              | 15 (17)                                 | 17 (19.3)                                  |                   |
| <b>Laboratory liver tests, mean/xULN (SD)</b>      |                                         |                                            |                   |
| ALT                                                | 193.8 (151.9)                           | 792.3 (1048.3)                             | <b>&lt;0.001</b>  |
| AST                                                | 166.4 (154.9)                           | 535.3 (906.9)                              | <b>0.01</b>       |
| GGT                                                | 670.7 (532.3)                           | 202.1 (176.4)                              | <b>&lt; 0.001</b> |
| ALP                                                | 804.4 (1687.2)                          | 177.6 (124.9)                              | <b>0.015</b>      |
| Total bilirubin                                    | 32.4 (45.7)                             | 19.8 (24.2)                                | 0.109             |
| Jaundice (total bilirubin > N)                     | 12 (10.3)                               | 10 (11.4)                                  | 0.538             |
| <b>Autoantibodies</b>                              |                                         |                                            |                   |
| ANA only                                           | 7 (8)                                   | 5 (5.7)                                    | 0.480             |
| ASMA                                               | 0                                       | 5 (5.7)                                    | <b>0.023</b>      |
| <b>Bile duct injury, n (%)</b>                     | 8 (9.1)                                 | 0                                          | <b>0.002</b>      |
| <b>Liver biopsy, n (%)</b>                         | 20 (22.7)                               | 23 (26.1)                                  | 0.666             |
| <b>Histology, n (%)</b>                            |                                         |                                            |                   |
| Biliary injury                                     | 16 (39)                                 | 6 (14.6)                                   | <b>&lt; 0.001</b> |
| Granuloma                                          | 4 (10.3)                                | 4 (10.3)                                   | 0.997             |
| Endothelitis                                       | 0                                       | 3 (10.3)                                   | <b>0.042</b>      |
| Fibrin ring granuloma                              | 1 (2.6)                                 | 0                                          | 0.299             |
| <b>Other irAEs, n (%)</b>                          |                                         |                                            |                   |
| Extra hepatic irAE                                 | 20 (22.7)                               | 13 (14.8)                                  | 0.088             |
| Gastrointestinal                                   | 6 (6.8)                                 | 4 (4.5)                                    | 0.454             |
| Cutaneous                                          | 4 (4.5)                                 | 7 (8)                                      | 0.375             |
| Endocrine                                          | 4 (4.5)                                 | 3 (3.4)                                    | 0.648             |
| Other irAE*                                        | 10 (11.4)                               | 3 (3.4)                                    | <b>0.028</b>      |
| Multiple irAEs                                     | 7 (8)                                   | 6 (6.8)                                    | 0.171             |
| <b>Hepatitis treatment, n (%)</b>                  |                                         |                                            |                   |
| Steroids only                                      | 15 (17)                                 | 31 (35.2)                                  | <b>0.005</b>      |
| UDCA only                                          | 5 (5.7)                                 | 0                                          | <b>0.005</b>      |
| Steroids + UDCA                                    | 18 (20.5)                               | 10 (11.4)                                  | <b>0.005</b>      |
| Steroid including regimen                          | 33 (37.5)                               | 41 (46.6)                                  | 0.065             |
| No treatment                                       | 5 (5.7)                                 | 4 (4.5)                                    | 0.672             |
| Second line treatment                              | 7 (8)                                   | 9 (10.2)                                   | 0.651             |
| <b>Days until resolution to grade 1, mean (SD)</b> | 69.5 (50)                               | 59 (49.4)                                  | 0.488             |

**Table S2: Clinico-biological features between immune-related sclerosing cholangitis and CHILI without macroscopic bile duct injury**

|                                                    | Bile duct stenosis<br>n= 8 (6.8 %) | No bile duct stenosis<br>109 (93.2 %) | <i>p value</i>    |
|----------------------------------------------------|------------------------------------|---------------------------------------|-------------------|
| <b>Age (years), mean (SD)</b>                      | 65.3 (8.9)                         | 63.2 (14.2)                           | 0.686             |
| <b>Sex, n (%)</b>                                  |                                    |                                       | 0.197             |
| Female                                             | 2 (1.7)                            | 52 (42.5)                             |                   |
| Male                                               | 6 (5.2)                            | 55 (47.8)                             |                   |
| <b>Cancer, n (%)</b>                               |                                    |                                       | 0.273             |
| Lung                                               | 3 (2.6)                            | 30 (26.1)                             |                   |
| Melanoma                                           | 1 (0.9)                            | 47 (40.9)                             |                   |
| Renal and urothelial                               | 2 (1.7)                            | 20 (17.4)                             |                   |
| Other cancer                                       | 2 (1.7)                            | 10 (8.7)                              |                   |
| <b>Checkpoint inhibitor, n (%)</b>                 |                                    |                                       | 0.254             |
| Anti-PD1/PDL1                                      | 7 (6.1)                            | 62 (53.9)                             |                   |
| Anti-CTLA4/Anti-LAG3                               | 0                                  | 4 (3.5)                               |                   |
| Combotherapy with anti-CTLA4                       | 1 (0.9)                            | 41 (35.7)                             |                   |
| <b>Cycles of ICI infusion, mean (SD)</b>           | 6.9 (3.4)                          | 4.4 (4.6)                             | 0.137             |
| <b>Time until onset (days), mean (SD)</b>          | 236 (197.7)                        | 173.6 (296.4)                         | 0.560             |
| <b>RUCAM</b>                                       |                                    |                                       | 0.754             |
| Possible (3-5)                                     | 0                                  | 7 (6.1)                               |                   |
| Probable (6-8)                                     | 5 (4.3)                            | 64 (55.7)                             |                   |
| Highly probable (≥ 9)                              | 3 (2.6)                            | 36 (31.3)                             |                   |
| <b>Laboratory liver tests, mean/xULN (SD)</b>      |                                    |                                       |                   |
| ALT                                                | 180.5 (107.8)                      | 463.1 (741.8)                         | 0.286             |
| AST                                                | 127.6 (136.6)                      | 327.2 (620.2)                         | 0.367             |
| GGT                                                | 1027.4 (821.7)                     | 353.3 (330.5)                         | <b>&lt; 0.001</b> |
| ALP                                                | 1818.9 (3776.8)                    | 319.7 (369.2)                         | <b>&lt; 0.001</b> |
| Total bilirubin                                    | 18.2 (23.9)                        | 24.2 (34.4)                           | 0.628             |
| Jaundice (total bilirubin > N)                     | 2 (1.7)                            | 26 (22.6)                             | 0.964             |
| <b>Autoantibodies</b>                              |                                    |                                       |                   |
| ANA only                                           | 0                                  | 16 (13.9)                             | 0.238             |
| ASMA                                               | 0                                  | 6 (5.3)                               | 0.489             |
| <b>Liver biopsy, n (%)</b>                         | 6 (5.2)                            | 43 (37.4)                             | 0.055             |
| <b>Histology, n (%)</b>                            |                                    |                                       |                   |
| Biliary injury                                     | 5 (10.6)                           | 21 (44.7)                             | 0.139             |
| Granuloma                                          | 0                                  | 9 (20.4)                              | 0.409             |
| Endothelitis                                       | 0                                  | 4 (11.4)                              | 0.334             |
| Fibrin ring granuloma                              | 0                                  | 1 (2.3)                               | 0.688             |
| <b>Other irAEs, n (%)</b>                          |                                    |                                       |                   |
| Extra hepatic irAE                                 | 5 (4.3)                            | 42 (36.5)                             | 0.197             |
| Gastrointestinal                                   | 2 (1.7)                            | 10 (8.7)                              | 0.162             |
| Cutaneous                                          | 0                                  | 13 (11.3)                             | 0.295             |
| Endocrine                                          | 2 (1.7)                            | 9 (7.8)                               | 0.124             |
| Other irAE*                                        | 2 (1.7)                            | 17 (14.8)                             | 0.503             |
| Multiple irAEs                                     | 1 (0.9)                            | 19 (16.5)                             | <b>0.002</b>      |
| <b>Hepatitis treatment, n (%)</b>                  |                                    |                                       |                   |
| Steroids only                                      | 1 (0.9)                            | 60 (52.2)                             | <b>0.008</b>      |
| UDCA only                                          | 1 (0.9)                            | 6 (5.2)                               | <b>0.008</b>      |
| Steroids + UDCA                                    | 6 (5.2)                            | 25 (21.7)                             | <b>0.008</b>      |
| Steroid including regimen                          | 7 (6.1)                            | 85 (73.9)                             | 0.582             |
| No treatment                                       | 0                                  | 16 (13.9)                             | 0.238             |
| Second line treatment                              | 3 (2.6)                            | 15 (13)                               | 0.078             |
| <b>Days until resolution to grade 1, mean (SD)</b> | 124 (26.4)                         | 50.5 (45)                             | <b>&lt; 0.001</b> |

Table S3: Comparison between treated and non-treated CHILI

|                                                    | Treatment<br>n= 100 (85.5 %) | No treatment<br>n= 17 (14.5 %) | <i>p value</i> |
|----------------------------------------------------|------------------------------|--------------------------------|----------------|
| <b>Age (years), mean (SD)</b>                      | 63.6 (13.9)                  | 61.2 (13.8)                    | 0.512          |
| <b>Sex, n (%)</b>                                  |                              |                                | 0.544          |
| Female                                             | 45 (38.5)                    | 9 (7.7)                        |                |
| Male                                               | 55 (47)                      | 8 (6.8)                        |                |
| <b>Cancer, n (%)</b>                               |                              |                                | 0.565          |
| Lung                                               | 29 (24.8)                    | 5 (4.3)                        |                |
| Melanoma                                           | 44 (37.6)                    | 5 (4.3)                        |                |
| Renal and urothelial                               | 18 (15.4)                    | 4 (3.4)                        |                |
| Other cancer                                       | 9 (7.7)                      | 3 (2.6)                        |                |
| <b>Checkpoint inhibitor, n (%)</b>                 |                              |                                | 0.508          |
| Anti-PD1/PDL1                                      | 58 (49.6)                    | 12 (10.3)                      |                |
| Anti-CTLA4/Anti-LAG3                               | 4 (3.4)                      | 0                              |                |
| Combotherapy with anti-CTLA4                       | 38 (32.5)                    | 5 (4.3)                        |                |
| <b>Pattern, n (%)</b>                              |                              |                                | 0.066          |
| Cholestatic                                        | 38 (32.5)                    | 5 (4.3)                        |                |
| Mixed                                              | 21 (17.9)                    | 8 (6.8)                        |                |
| Cytolytic                                          | 41 (35)                      | 4 (3.4)                        |                |
| <b>Cycles of ICI infusion, mean (SD)</b>           | 4.4 (4.7)                    | 5.4 (4)                        | 0.405          |
| <b>Time until onset (days), mean (SD)</b>          | 181.1 (307)                  | 144.6 (135.7)                  | 0.632          |
| <b>RUCAM</b>                                       |                              |                                | 0.456          |
| Possible (3-5)                                     | 7 (6)                        | 0                              |                |
| Probable (6-8)                                     | 61 (52.1)                    | 10 (8.5)                       |                |
| Highly probable (≥ 9)                              | 32 (27.4)                    | 7 (6)                          |                |
| <b>Laboratory liver tests, mean/xULN (SD)</b>      |                              |                                |                |
| ALT                                                | 469.4 (763.9)                | 284.4 (220.6)                  | 0.325          |
| AST                                                | 332.2 (640.5)                | 203.1 (161.6)                  | 0.412          |
| GGT                                                | 419.4 (435.1)                | 336.2 (288.4)                  | 0.450          |
| ALP                                                | 454.7 (1145.4)               | 245.5 (179.3)                  | 0.455          |
| Total bilirubin                                    | 25 (35.5)                    | 15.6 (14.2)                    | 0.299          |
| Jaundice (total bilirubin > N)                     | 26 (22.2)                    | 2 (1.7)                        | 0.203          |
| <b>Autoantibodies</b>                              |                              |                                |                |
| ANA only                                           | 14 (12)                      | 2 (1.7)                        | 0.804          |
| ASMA                                               | 6 (5.2)                      | 0                              | 0.295          |
| <b>Bile duct injury, n (%)</b>                     | 8 (7)                        | 0                              | 0.238          |
| <b>Liver biopsy, n (%)</b>                         | 45 (38.5)                    | 4 (3.4)                        | 0.097          |
| <b>Histology, n (%)</b>                            |                              |                                |                |
| Biliary injury                                     | 23 (48.9)                    | 3 (6.4)                        | 0.408          |
| Granuloma                                          | 8 (18.1)                     | 1 (2.3)                        | 0.148          |
| Endothelitis                                       | 4 (11.4)                     | 0                              | 0.515          |
| Fibrin ring granuloma                              | 1 (2.3)                      | 0                              | 0.784          |
| <b>Other irAEs, n (%)</b>                          |                              |                                |                |
| Extra hepatic irAE                                 | 41 (35)                      | 7 (6)                          | 0.989          |
| Gastrointestinal                                   | 12 (10.3)                    | 0                              | 0.132          |
| Cutaneous                                          | 13 (11.1)                    | 0                              | 0.115          |
| Endocrine                                          | 10 (8.5)                     | 1 (0.9)                        | 0.591          |
| Other irAE*                                        | 18 (15.4)                    | 2 (1.7)                        | 0.528          |
| Multiple irAEs                                     | 19 (16.2)                    | 1 (0.9)                        | 0.121          |
| <b>Days until resolution to grade 1, mean (SD)</b> | 63.8 (49.9)                  | 23.2 (14.6)                    | <b>0.007</b>   |
| <b>Cancer status (RECIST 1.1), n (%)</b>           |                              |                                | 0.278          |
| Progressive disease                                | 23 (20)                      | 7 (6.1)                        |                |
| Stable disease                                     | 13 (11.3)                    | 4 (3.5)                        |                |
| Partial response                                   | 34 (29.6)                    | 4 (3.5)                        |                |
| Complete response                                  | 20 (17.4)                    | 1 (0.9)                        |                |
| <b>CHILI recurrence, n (%)</b>                     | 9 (19.6)                     | 3 (6.5)                        | 0.153          |

Table S4: Comparison between steroids including treatment and other conditions\*

|                                                    | Steroids including regimen<br>n= 93 (79.5 %) | Other treatments<br>n= 24 (20.5 %) | <i>p</i> value |
|----------------------------------------------------|----------------------------------------------|------------------------------------|----------------|
| <b>Age (years), mean (SD)</b>                      | 63.4 (14.1)                                  | 62.7 (13)                          | 0.827          |
| <b>Sex, n (%)</b>                                  |                                              |                                    | 0.672          |
| Female                                             | 42 (35.9)                                    | 12 (10.3)                          |                |
| Male                                               | 51 (43.6)                                    | 12 (10.3)                          |                |
| <b>Cancer, n (%)</b>                               |                                              |                                    | 0.193          |
| Lung                                               | 26 (22.2)                                    | 8 (6.8)                            |                |
| Melanoma                                           | 42 (35.9)                                    | 7 (6)                              |                |
| Renal and urothelial                               | 18 (15.4)                                    | 4 (3.4)                            |                |
| Other cancer                                       | 7 (6)                                        | 5 (4.3)                            |                |
| <b>Checkpoint inhibitor, n (%)</b>                 |                                              |                                    | 0.082          |
| Anti-PD1/PDL1                                      | 51 (43.6)                                    | 19 (16.2)                          |                |
| Anti-CTLA4/Anti-LAG3                               | 4 (3.4)                                      | 0                                  |                |
| Combotherapy with anti-CTLA4                       | 38 (32.5)                                    | 5 (4.3)                            |                |
| <b>Pattern, n (%)</b>                              |                                              |                                    | <b>0.025</b>   |
| Cholestatic                                        | 33 (28.2)                                    | 10 (8.5)                           |                |
| Mixed                                              | 19 (16.2)                                    | 10 (8.5)                           |                |
| Hepatocellular                                     | 41 (35)                                      | 4 (3.4)                            |                |
| <b>Cycles of ICI infusion, mean (SD)</b>           | 4.5 (4.8)                                    | 4.7 (3.6)                          | 0.799          |
| <b>Time until onset (days), mean (SD)</b>          | 169.7 (294.9)                                | 199.2 (266.4)                      | 0.658          |
| <b>RUCAM</b>                                       |                                              |                                    | 0.292          |
| Possible (3-5)                                     | 7 (6)                                        | 0                                  |                |
| Probable (6-8)                                     | 57 (48.7)                                    | 14 (12)                            |                |
| Highly probable (≥ 9)                              | 29 (24.8)                                    | 10 (8.5)                           |                |
| <b>Laboratory liver tests, mean/xULN (SD)</b>      |                                              |                                    |                |
| ALT                                                | 488.6 (787.7)                                | 263.9 (208.9)                      | 0.170          |
| AST                                                | 339.1 (661.1)                                | 213.9 (182.6)                      | 0.361          |
| GGT                                                | 393.9 (410.8)                                | 458.9 (444.2)                      | 0.506          |
| ALP                                                | 441.4 (1167.9)                               | 356 (484.8)                        | 0.726          |
| Total bilirubin                                    | 24.9 (36.1)                                  | 18.7 (19.6)                        | 0.429          |
| Jaundice (total bilirubin > N)                     | 24 (20.5)                                    | 4 (3.4)                            | 0.349          |
| <b>Autoantibodies</b>                              |                                              |                                    |                |
| ANA only                                           | 13 (11.1)                                    | 3 (2.6)                            | 0.851          |
| ASMA                                               | 6 (5.2)                                      | 0                                  | 0.196          |
| <b>Bile duct injury, n (%)</b>                     | 7 (6.1)                                      | 1 (0.9)                            | 0.582          |
| <b>Liver biopsy, n (%)</b>                         | 42 (35.9)                                    | 7 (6)                              | 0.157          |
| <b>Histology, n (%)</b>                            |                                              |                                    |                |
| Biliary injury                                     | 21 (44.7)                                    | 5 (10.6)                           | 0.353          |
| Granuloma                                          | 8 (18.1)                                     | 1 (2.3)                            | 0.378          |
| Endothelitis                                       | 4 (11.4)                                     | 0                                  | 0.334          |
| Fibrin ring granuloma                              | 1 (2.3)                                      | 0                                  | 0.688          |
| <b>Other irAEs, n (%)</b>                          |                                              |                                    |                |
| Extra hepatic irAE                                 | 38 (32.5)                                    | 10 (8.5)                           | 0.943          |
| Gastrointestinal                                   | 12 (10.3)                                    | 0                                  | 0.063          |
| Cutaneous                                          | 13 (11.1)                                    | 0                                  | 0.052          |
| Endocrine                                          | 9 (7.7)                                      | 2 (1.7)                            | 0.841          |
| Other irAE*                                        | 16 (13.7)                                    | 4 (3.4)                            | 0.950          |
| Multiple irAEs                                     | 19 (16.2)                                    | 1 (0.9)                            | 0.080          |
| <b>Second-line immunosuppressant, n (%)</b>        | 18 (15.4)                                    | 0                                  | <b>0.019</b>   |
| <b>Days until resolution to grade 1, mean (SD)</b> | 23.2 (14.6)                                  | 63.8 (49.9)                        | <b>0.007</b>   |
| <b>Cancer status (RECIST 1.1), n (%)</b>           |                                              |                                    | 0.222          |
| Progressive disease                                | 21 (18.3)                                    | 9 (7.8)                            |                |
| Stable disease                                     | 12 (10.4)                                    | 5 (4.3)                            |                |
| Partial response                                   | 31 (27)                                      | 7 (6.1)                            |                |
| Complete response                                  | 20 (17.4)                                    | 1 (0.9)                            |                |

|                                |          |         |       |
|--------------------------------|----------|---------|-------|
| <b>CHILI recurrence, n (%)</b> | 8 (17.4) | 4 (8.7) | 0.257 |
|--------------------------------|----------|---------|-------|

\*UDCA only or no treatment

Table S5: Comparison between biopsied and non-biopsied patients

|                                                    | Biopsy<br>n= 49 (41.9 %) | No biopsy<br>n= 68 (58.1 %) | <i>p</i><br><i>value</i> |
|----------------------------------------------------|--------------------------|-----------------------------|--------------------------|
| <b>Age (years), mean (SD)</b>                      | 62.8 (15)                | 63.6 (13)                   | 0.758                    |
| <b>Sex, n (%)</b>                                  |                          |                             | 0.370                    |
| Female                                             | 25 (21.4)                | 29 (24.8)                   |                          |
| Male                                               | 24 (20.5)                | 39 (33.3)                   |                          |
| <b>Cancer, n (%)</b>                               |                          |                             | 0.109                    |
| Lung                                               | 13 (11.1)                | 21 (17.9)                   |                          |
| Melanoma                                           | 19 (16.2)                | 30 (25.6)                   |                          |
| Renal and urothelial                               | 14 (12)                  | 8 (6.8)                     |                          |
| Other cancer                                       | 3 (2.6)                  | 9 (7.7)                     |                          |
| <b>Checkpoint inhibitor, n (%)</b>                 |                          |                             | 0.243                    |
| Anti-PD1/PDL1                                      | 26 (22.2)                | 44 (37.6)                   |                          |
| Anti-CTLA4/Anti-LAG3                               | 3 (2.6)                  | 1 (0.9)                     |                          |
| Combotherapy with anti-CTLA4                       | 20 (17.1)                | 23 (19.7)                   |                          |
| <b>Cycles of ICI infusion, mean (SD)</b>           | 4.4 (4.1)                | 4.5 (4.9)                   | 0.892                    |
| <b>Time until onset (days), mean (SD)</b>          | 184.8 (233.6)            | 169.2 (323.7)               | 0.774                    |
| <b>RUCAM</b>                                       |                          |                             | 0.427                    |
| Possible (3-5)                                     | 2 (1.7)                  | 5 (4.3)                     |                          |
| Probable (6-8)                                     | 33 (28.2)                | 38 (32.5)                   |                          |
| Highly probable (≥ 9)                              | 14 (12)                  | 25 (21.4)                   |                          |
| <b>Laboratory liver tests, mean (SD)</b>           |                          |                             |                          |
| ALT                                                | 608.1 (1010.2)           | 323.2 (340)                 | <b>0.033</b>             |
| AST                                                | 415.02 (857.3)           | 240.2 (276.7)               | 0.118                    |
| GGT                                                | 526.2 (516.1)            | 317.1 (295.7)               | 0.007                    |
| ALP                                                | 577.2 (1572.3)           | 314.2 (393.9)               | 0.188                    |
| Total bilirubin                                    | 31.6 (45)                | 17.8 (19.6)                 | <b>0.028</b>             |
| Jaundice (total bilirubin > N)                     | 16 (13.7)                | 12 (10.3)                   | 0.061                    |
| <b>Autoantibodies</b>                              |                          |                             |                          |
| ANA only                                           | 7 (6)                    | 9 (7.7)                     | 0.870                    |
| ASMA                                               | 4 (3.5)                  | 2 (1.7)                     | 0.221                    |
| <b>Bile duct injury, n (%)</b>                     | 6 (5.2)                  | 2 (1.7)                     | 0.055                    |
| <b>Other irAEs, n (%)</b>                          |                          |                             |                          |
| Extra hepatic irAE                                 | 15 (12.8)                | 33 (28.2)                   | 0.052                    |
| Gastrointestinal                                   | 3 (2.6)                  | 9 (7.7)                     | 0.211                    |
| Cutaneous                                          | 4 (3.4)                  | 9 (7.7)                     | 0.389                    |
| Endocrine                                          | 4 (3.4)                  | 7 (6)                       | 0.697                    |
| Other irAE                                         | 5 (4.3)                  | 15 (12.8)                   | 0.093                    |
| Multiple irAEs                                     | 6 (5.1)                  | 14 (12)                     | 0.244                    |
| <b>Hepatitis treatment, n (%)</b>                  |                          |                             |                          |
| Corticoids only                                    | 3 (18.8)                 | 40 (34.2)                   | 0.19                     |
| UDCA only                                          | 3 (2.6)                  | 4 (3.4)                     | 0.19                     |
| Corticoids + UDCA                                  | 20 (17.1)                | 11 (9.4)                    | 0.19                     |
| Corticoids including regimen                       | 42 (35.9)                | 51 (43.6)                   | 0.157                    |
| No treatment                                       | 4 (3.4)                  | 13 (11.1)                   | 0.097                    |
| Second line treatment                              | 16 (13.7)                | 2 (1.7)                     | <<br><b>0.001</b>        |
| <b>Days until resolution to grade 1, mean (SD)</b> | 75.2 (54.5)              | 42.4 (37.7)                 | 0.006                    |



**Table S6: Comparison between patients with and without rechallenge**

|                                                    | Rechallenge<br>n= 51 (43.6%) | No rechallenge<br>n= 66 (56.4%) | <i>p value</i> |
|----------------------------------------------------|------------------------------|---------------------------------|----------------|
| <b>Age (years), mean (SD)</b>                      | 61.3 (15.3)                  | 64.7 (12.5)                     | 0.182          |
| <b>Sex, n (%)</b>                                  |                              |                                 | 0.863          |
| Female                                             | 24 (20.5)                    | 30 (25.6)                       |                |
| Male                                               | 27 (23.1)                    | 36 (30.8)                       |                |
| <b>Pre-existing liver disease, n (%)</b>           |                              |                                 | 0.277          |
| Cirrhosis                                          | 1 (0.9)                      | 4 (3.4)                         |                |
| <b>Cancer, n (%)</b>                               |                              |                                 | 0.644          |
| Lung                                               | 15 (12.8)                    | 19 (16.2)                       |                |
| Melanoma                                           | 23 (19.7)                    | 26 (22.2)                       |                |
| Renal and urothelial                               | 7 (6)                        | 15 (12.8)                       |                |
| Other cancer                                       | 6 (5.1)                      | 6 (5.1)                         |                |
| <b>Checkpoint inhibitor, n (%)</b>                 |                              |                                 | 0.197          |
| Anti-PD-1/PDL-1                                    | 31 (26.5)                    | 39 (33.3)                       |                |
| Anti-CTLA-4/Anti-LAG-3                             | 0                            | 4 (3.4)                         |                |
| Combi-therapy with anti-CTLA-4                     | 20 (17.1)                    | 23 (19.7)                       |                |
| <b>Cycles of ICI infusion, mean (SD)</b>           | 4.4 (5)                      | 4.6 (4.3)                       | 0.894          |
| <b>Time until onset (days), mean (SD)</b>          | 137.5 (198.2)                | 205.4 (340.8)                   | 0.208          |
| <b>Autoantibodies</b>                              |                              |                                 |                |
| ANA only                                           | 9 (7.7)                      | 7 (6)                           | 0.272          |
| ASMA                                               | 2 (1.7)                      | 4 (3.5)                         | 0.577          |
| <b>Pattern, n (%)</b>                              |                              |                                 | 0.312          |
| Cholestatic                                        | 16 (13.7)                    | 27 (23.1)                       |                |
| Mixed                                              | 16 (13.7)                    | 13 (11.1)                       |                |
| Hepatocellular                                     | 19 (16.2)                    | 26 (22.2)                       |                |
| <b>Severity (CTCAE), n (%)</b>                     |                              |                                 | 0.006          |
| Grade 1                                            | 1 (0.9)                      | 3 (2.6)                         |                |
| Grade 2                                            | 13 (11.1)                    | 4 (3.4)                         |                |
| Grade 3                                            | 32 (27.4)                    | 41 (35)                         |                |
| Grade 4                                            | 5 (4.3)                      | 18 (15.4)                       |                |
| <b>Jaundice (total bilirubin &gt; N)</b>           | 9 (7.7)                      | 19 (16.2)                       | 0.161          |
| <b>Bile duct injury, n (%)</b>                     | 3 (2.6)                      | 5 (4.3)                         | 0.686          |
| <b>Liver biopsy, n (%)</b>                         | 13 (11.1)                    | 36 (30.8)                       | 0.002          |
| <b>Histology, n (%)</b>                            |                              |                                 |                |
| Biliary injury                                     | 6 (12.8)                     | 20 (42.6)                       | 0.435          |
| Granuloma                                          | 5 (11.4)                     | 4 (9)                           | 0.093          |
| Endothelitis                                       | 1 (2.9)                      | 3 (8.6)                         | 0.593          |
| Fibrin ring granuloma                              | 1 (2.3)                      | 0                               | 0.118          |
| <b>Other irAEs, n (%)</b>                          |                              |                                 |                |
| Extra hepatic irAE                                 | 19 (16.2)                    | 29 (24.8)                       | 0.466          |
| Gastrointestinal                                   | 4 (3.4)                      | 8 (6.8)                         | 0.449          |
| Cutaneous                                          | 8 (6.8)                      | 5 (4.3)                         | 0.166          |
| Endocrine                                          | 6 (5.1)                      | 5 (4.3)                         | 0.441          |
| Other irAE*                                        | 7 (6)                        | 13 (11.1)                       | 0.395          |
| Multiple irAEs (>2)                                | 10 (8.5)                     | 10 (8.5)                        | 0.397          |
| <b>Hepatitis treatment, n (%)</b>                  |                              |                                 |                |
| Corticoids including regimen                       | 39 (33.3)                    | 54 (46.2)                       | 0.477          |
| No treatment                                       | 8 (6.8)                      | 9 (7.7)                         | 0.755          |
| Other immunosuppressant                            | 5 (4.3)                      | 13 (11.1)                       | 0.141          |
| <b>Days until resolution to grade 1, mean (SD)</b> | 47.5 (36.9)                  | 65.5 (56.7)                     | 0.136          |
| <b>Cancer status (RECIST 1.1), n (%)</b>           |                              |                                 | 0.533          |
| Progressive disease                                | 14 (12.2)                    | 16 (13.9)                       |                |
| Stable disease                                     | 9 (7.8)                      | 8 (7)                           |                |
| Partial response                                   | 17 (14.8)                    | 21 (18.3)                       |                |
| Complete response                                  | 6 (5.2)                      | 15 (13)                         |                |
| Unmesurable                                        | 5 (4.3)                      | 4 (3.5)                         |                |

Table S7 : Histology

|                                         | Biopsied patients<br>n= 49 (%) |
|-----------------------------------------|--------------------------------|
| <b><u>Inflammation and necrosis</u></b> |                                |
| Portal inflammation                     | 35 (71.4)                      |
| Portal necrosis                         | 9 (18.4)                       |
| Lobular inflammation                    | 41 (83.7)                      |
| Lobular necrosis                        | 24 (49)                        |
| Centrilobular injury                    | 14 (28.6)                      |
| Panlobular injury                       | 17 (34.7)                      |
| Interface hepatitis                     | 5 (10.2)                       |
| Portal endothelitis                     | 3 (6.1)                        |
| Centro venular endothelitis             | 1 (2)                          |
| <b><u>Cellular infiltrate</u></b>       | 46 (93.9)                      |
| Lymphocytes                             | 34 (69.4)                      |
| Neutrophils                             | 21 (42.9)                      |
| Eosinophils                             | 25 (51)                        |
| Histiocytes                             | 16 (32.7)                      |
| Macrophages                             | 20 (40.8)                      |
| Plasma cells                            | 13 (26.5)                      |
| Granuloma                               | 10 (20.4)                      |
| Fibrin ring granuloma                   | 1 (2)                          |
| <b><u>Biliary injury</u></b>            | 26 (53)                        |
| Bilirubinostasis                        | 4 (8.1)                        |
| Ductopenia                              | 2 (4.1)                        |
| Ductular reaction                       | 10 (20.4)                      |
| Ductular dystrophia                     | 13 (26.5)                      |
| Inflammatory cholangitis                | 15 (30.6)                      |
| Lymphocytic cholangitis                 | 9 (18.4)                       |
| Neutrophilic cholangitis                | 2 (4.1)                        |
| Non-suppurative destructive cholangitis | 3 (6.1)                        |
| Granulomatous cholangitis               | 2 (4.1)                        |
| Obstructive fibrous pericholangiolitis  | 0                              |
| <b><u>Fibrosis</u></b>                  | 16 (32.7)                      |
| F0                                      | 31 (63.3)                      |
| Portal fibrosis (F1)                    | 11 (22.4)                      |
| Centrolobular fibrosis (F1)             | 5 (10.2)                       |
| Fibrosis with septa (F2)                | 0                              |
| Fibrosis with numerous septa (F3)       | 0                              |
| Cirrhosis (F4)                          | 1 (2)                          |
